1

2 **Title**

3 Markerless Video Analysis of Spontaneous Bodily Movements in 4-Month-Old Infants Predicts

4 Autism-like Behavior in 18-Month-Olds.

5

6 **RUNNING HEAD**

7 AUTISM AND INFANTILE MOVEMENTS

8 •

9 **Authors**

10 Hirokazu Doi<sup>†1,2</sup>, Naoya Iijima<sup>†3</sup>, Akira Furui<sup>3</sup>, Zu Soh<sup>3</sup>, Kazuyuki Shinohara<sup>1</sup>, Mayuko

11 Iriguchi<sup>1</sup>, Koji Shimatani<sup>4</sup>, Toshio Tsuji<sup>3\*</sup>

12

13 **Affiliations**

14 <sup>1</sup>Graduate School of Biomedical Sciences, Nagasaki University

15 <sup>2</sup>School of Science and Engineering, Kokushikan University

16 <sup>3</sup>Graduate School of Advanced Science and Engineering, Hiroshima University

17 <sup>4</sup>Faculty of Health and Welfare, Prefectural University of Hiroshima

18

19 <sup>†</sup>These authors contributed equally to this work

20

21 \*Corresponding Author

22 Toshio Tsuji\*

23 Affiliation: Graduate School of Advanced Science and Engineering, Hiroshima University

24 Address: 1-4-1, Kagamiyama, Higashi-Hiroshima, 739-8527 Japan

25 e-mail: [submission210907-ttsuji@yahoo.co.jp](mailto:submission210907-ttsuji@yahoo.co.jp)

26 ORCID iD 0000-0002-7689-3963

27

28 **KeyWords:** Autism Spectrum Disorders, Machine Learning, General Movement, Early

29 Screening

30

31

32 **Abstract**

33 Early intervention is now considered the core treatment strategy for autism spectrum disorders  
34 (ASD). Thus, it is of significant clinical importance to establish a screening tool for the early  
35 detection of ASD in infants. To achieve this goal, in a longitudinal design, we analysed spontaneous  
36 bodily movements of 4-month-old infants and assessed their ASD-like behaviours at 18 months of  
37 age. Infants at high risk for ASD at 18 months of age exhibited less rhythmic and weaker bodily  
38 movement patterns at 4 months of age than low-risk infants. When the observed bodily movement  
39 patterns were submitted to a machine learning-based analysis, linear and non-linear classifiers  
40 successfully predicted ASD-like behaviour at 18 months of age based on the bodily movement  
41 patterns at 4 months of age, at the level acceptable for practical use. This suggests the utility of the  
42 proposed method for the early screening of infants at risk for ASD.

43

44

45

46

## 47 **1. Introduction**

48 Autism spectrum disorder (ASD) is a developmental disorder, typically characterised by a  
49 collection of symptoms, including repetitive behaviours, restricted interests, and poor social  
50 communication skills (American Psychiatric Association, 2013). ASD is generally considered to  
51 have genetic underpinnings (Anderson, 2015). Recently, the prevalence of ASD has been increasing.  
52 This is partly owing to increased public awareness and changes in the ASD diagnostic criteria.  
53 However, a significant increase in the prevalence of ASD remains unexplained; hence, there is a  
54 pressing need for establishing reliable treatment strategies for ASD.

55 At this point, there is no definitive cure for ASD, but an increasing number of studies  
56 indicate the efficacy of early intervention for children with ASD (Dawson et al., 2010; Green et al.,  
57 2015), which is manifested in improved prognosis and social adaptation. Thus, early detection of  
58 children at risk for ASD and early intervention are now considered to be a core treatment strategy  
59 for ASD (Dawson, 2008).

60 It is generally accepted that ASD can be diagnosed at around 3 years of age. However, a  
61 number of studies have indicated that early signs of ASD can be detected during infancy and  
62 toddlerhood (Adrien et al., 1993; Baranek, 1999; Osterling, Dawson & Munson, 2002; Klin et al.,  
63 2009). For example, a retrospective study by Osetrling et al. (2002) analysed birth-day videos of  
64 ASD and typically developed (TD) children, and found that children later diagnosed with ASD  
65 showed lower social functioning compared with TD children. Likewise, a prospective study by  
66 Elsabbagh et al. (2012) revealed that children with ASD show atypical electrophysiological  
67 activation to socially significant facial information (e.g. direct gaze), compared with their siblings  
68 without ASD and with TD children as young as 10 months of age.

69 Previous findings pertaining to the early signs of ASD raise the possibility that children at  
70 risk for ASD can be screened during toddlerhood or, in some cases, during infancy. Early detection

71 could lead to early intervention, potentially improving the prognosis for children with ASD and/or  
72 for those with sub-clinical-level symptoms. However, presently, there are no established tools for  
73 early detection of the ASD risk, and screening of children at risk for ASD requires time-consuming  
74 assessments and/or observations by teams of multidisciplinary professionals consisting of  
75 experienced clinicians and psychologists (Zwaigenbaum et al., 2009).

76 Atypical motoric function is one of the most frequently reported signs of ASD during early  
77 development (Teitelbaum et al., 1998; Ozonoff et al., 2008). Many studies have reported various  
78 types of atypical bodily movement patterns, from infancy and toddlerhood, such as unbalanced  
79 posture and movement (Esopsito et al., 2009, 2011; Dawson et al., 2018), hypotonia (Adrien et al.,  
80 1993), spasticity in limb extremities (Dawson et al., 2000) and impairment in manual movement  
81 control (Sacrey et al., 2018). These behavioural observations are in line with neuroimaging-based  
82 findings and histological studies on the brains of humans with ASD, in which atypical patterns have  
83 been reported regarding the morphology and function of motor-related neural regions, such as the  
84 basal ganglia and cerebellum (Rinehart et al., 2006; Qiu et al., 2010).

85 In studies on motor function during infancy, intensive attention has been paid to  
86 spontaneous movements in the supine position, which can be evaluated starting from the neonatal  
87 period. Neonates and infants exhibit a repertoire of bodily movement patterns in the supine position,  
88 which has been termed the general movement (GM). Prechtel et al. investigated the developmental  
89 trajectory of GM in TD children and proposed a framework for qualitative assessment of GM that  
90 can be used for predicting the risk of deficiency in higher-order brain functions, such as cerebral  
91 palsy (Einspieler et al., 2016; Burger & Louw, 2009). Although the number is relatively small,  
92 several studies have also indicated the utility of GM for assessing the risk of psychiatric conditions  
93 (Einspieler et al., 2014; Hadders-Algra, Bouwstra & Groen, 2009).

94           Considering the success of the GM assessment for predicting the risk of neurological and  
95 psychiatric conditions, together with the prevalence of atypical motoric development patterns in  
96 children with ASD, it seems feasible to establish an early screening method for objectively  
97 evaluating the risk of ASD based on the analysis of bodily motion patterns during early  
98 development. Several researchers have developed systems for automatic assessment of GM using  
99 image analysis techniques (Gao et al., 2019; Marcroft et al., 2015; Støen et al., 2009). However,  
100 these studies did not address the possibility of the ASD risk evaluation.

101           The primary goal of the present study was to examine whether bodily movement patterns  
102 during early infancy are predictive of the ASD risk, which becomes evident later in the development  
103 in a prospective design. To achieve this goal, we video-recorded spontaneous bodily movements in  
104 4-month-old infants and quantified their features using a novel markerless system for infant  
105 movement evaluation (Osawa et al., 2009; Tsuji et al., 2020; Kinoshita et al., 2020; Kawashima et  
106 al., 2020; Tacchino et al., 2021). Classifiers were trained for predicting the ASD risk in 18-month-  
107 old infants, based on their bodily movement patterns at 4 months of age. The design of the current  
108 study is schematically shown in Figure 1. In contrast to some of the other proposed methods of  
109 automated infant movement analysis, our system does not require special equipment or attachment  
110 of sensors to the body surface; thus, it can be easily implemented in clinical settings.

111           The risk of ASD in 18-month-old infants was evaluated using the Modified Checklist for  
112 Autism in Toddlerhood (MCHAT) (Inada et al., 2011; Kamio et al., 2015). The MCHAT is a  
113 questionnaire widely used for early screening of the ASD risk, and is reported to be applicable to  
114 toddlers as young as 18 months of age. Although the specificity of the MCHAT method is not very  
115 high, it captures early signs of atypical development broadly in many domains, such as social  
116 communication and sensory processing.

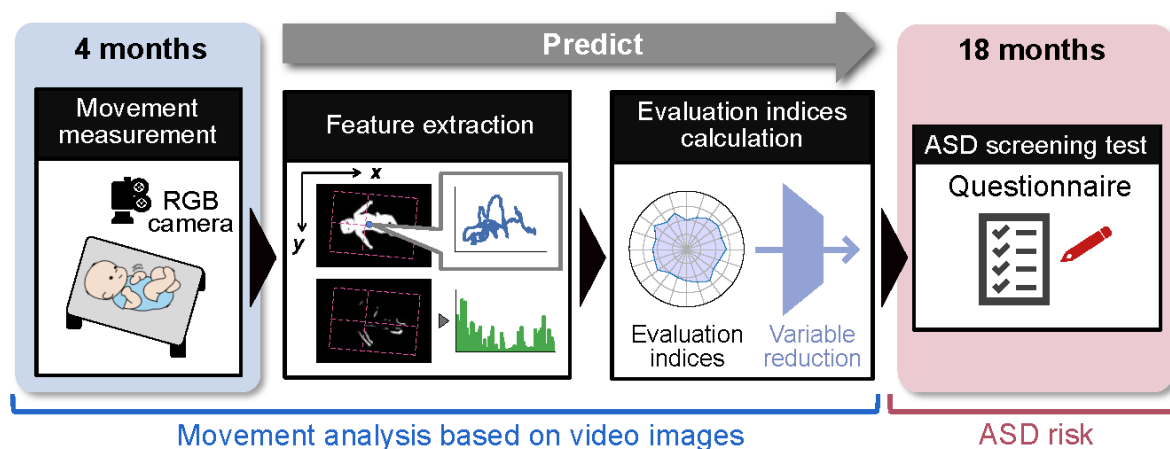

117  
118 **Figure 1.** Schematic representation of infant video recording setting and the flow of information  
119 processing.

## 121 2. Results

122 Of the 62 mother-infant pairs who participated in the video-recording sessions at 4 months  
123 of age, 58 mothers returned the MCHAT questionnaire at 18 months of age. Among these 58  
124 mother-infant pairs, bodily movement analysis was performed for 41 infants. Video recordings  
125 from 17 infants were discarded owing to their short length ( $\leq 3$  min;  $n = 13$ ) and low frequency ( $I_1$   
126  $\leq 10\%$ ;  $n = 4$ ) of bodily movement in them. There were no significant differences between these 41  
127 mother-infant pairs and 21 pairs whose data were discarded in terms of the days after birth ( $W =$   
128  $1.439, p = 0.156$ ), the weight at birth ( $W = 1.227, p = 0.227$ ), the gestational age at birth ( $W = 1.032,$   
129  $p = 0.308$ ), and mother's age at birth ( $W = -1.6, p = 0.119$ ). The distributions of high-and low-risk  
130 children did not differ between 41 mother-infant pairs and 17 mother-infant pairs whose MCHAT  
131 data were available but were discarded from the final analysis ( $p = 0.715$ ); this conclusion was  
132 reached based on Fisher's exact test. Thus, although the data attrition rate was relatively high, there  
133 were no signs of selection bias.

134 Among the 41 infants, seven were evaluated to be at high risk for ASD (the high-risk group).  
135 The age-in-days on the day of video recording, weights at birth, the gestational ages of the infants,

136 and the mothers' ages, for the high-and low-risk groups, are summarized in Table 1. The Brunner—  
 137 Munzel test did not reveal significant group differences either in age ( $W = 0.067$ ,  $p = 0.95$ ), weight  
 138 at birth ( $W = -1.400$ ,  $p = 0.18$ ), gestational age ( $W = 0.214$ ,  $p = 0.835$ ), or mother's age at birth ( $W$   
 139  $= 1.172$ ,  $p = 0.265$ ).

140 *Table 1. Background information of infants and mothers. In the parenthesis are the standard*  
 141 *deviations.*

| Group                                | High Risk      | Low Risk       | $W$    | $p$ -value |
|--------------------------------------|----------------|----------------|--------|------------|
| Days after birth at recording (days) | 128.6 (10.4)   | 125.9 (5.7)    | 0.0669 | 0.949      |
| Weight at birth (g)                  | 2964.0 (221.7) | 3121.2 (383.1) | -1.400 | 0.179      |
| Gestational age (days)               | 278.9 (7.8)    | 278.1 (7.9)    | 0.214  | 0.835      |
| Mother's age at birth (yrs)          | 31.3 (3.6)     | 33.4 (4.9)     | -1.172 | 0.265      |

142

143 *2-1. Feature Selection*

144 We identified and quantified 26 bodily movement features; these are summarized in Table  
 145 2. Appendix contains more detailed definitions of these bodily movement features. The boxplots of  
 146 each bodily movement feature extracted from video recordings are shown in Figure 2 for the low-  
 147 and high-risk groups.

148 *Table 2. Summary of bodily movement features.*

| Feature            | Definition                                                                           |
|--------------------|--------------------------------------------------------------------------------------|
| $^{(A_k)}I_1$      | Movement frequency in body region $k$ ( $A_k$ ; $k = 1\sim 6$ )                      |
| $^{(A_k)}I_2$      | Movement strength in body region $k$ ( $A_k$ ; $k = 1\sim 6$ )                       |
| $^{(A_k)}I_3$      | Movement count in body region $k$ ( $A_k$ ; $k = 1\sim 6$ )                          |
| $^{(A_5, A_6)}I_4$ | Ratio between movement frequency in upper ( $A_5$ ) and lower body ( $A_6$ ) regions |
| $^{(A_5, A_6)}I_5$ | Ratio between movement strength in upper ( $A_5$ ) and lower body ( $A_6$ ) regions  |
| $^{(A_5, A_6)}I_6$ | Movement coordination between upper ( $A_5$ ) and lower body ( $A_6$ ) regions       |



|                      |                                                                                                                                 |
|----------------------|---------------------------------------------------------------------------------------------------------------------------------|
| $(A_{5,6})I_7$       | Central frequency of time-series of movement in upper ( $A_5$ ) and lower body ( $A_6$ ) regions                                |
| $(A_{5,6})I_8$       | Second moment around central frequency of time-series of movement in upper ( $A_5$ ) and lower body ( $A_6$ ) regions           |
| $I_{9,x}, I_{9,y}$   | Central frequency of time-series of body center velocity along x- (top-bottom) and y- (left-right) axes                         |
| $I_{10,x}, I_{10,y}$ | Second moment around central frequency of time-series of body center velocity along x- (top-bottom) and y- (left-right) axes    |
| $I_{11,x}, I_{11,y}$ | Central frequency of time-series of body center fluctuation along x- (top-bottom) and y- (left-right) axes                      |
| $I_{12,x}, I_{12,y}$ | Second moment around central frequency of time-series of body center fluctuation along x- (top-bottom) and y- (left-right) axes |
| $I_{13,x}, I_{13,y}$ | Average of absolute values of body center velocity along x- and y-axes                                                          |
| $I_{14,x}, I_{14,y}$ | Standard deviation of body center fluctuation along x- and y-axes                                                               |
| $I_{15}$             | Averaged area of body center excursion                                                                                          |

149

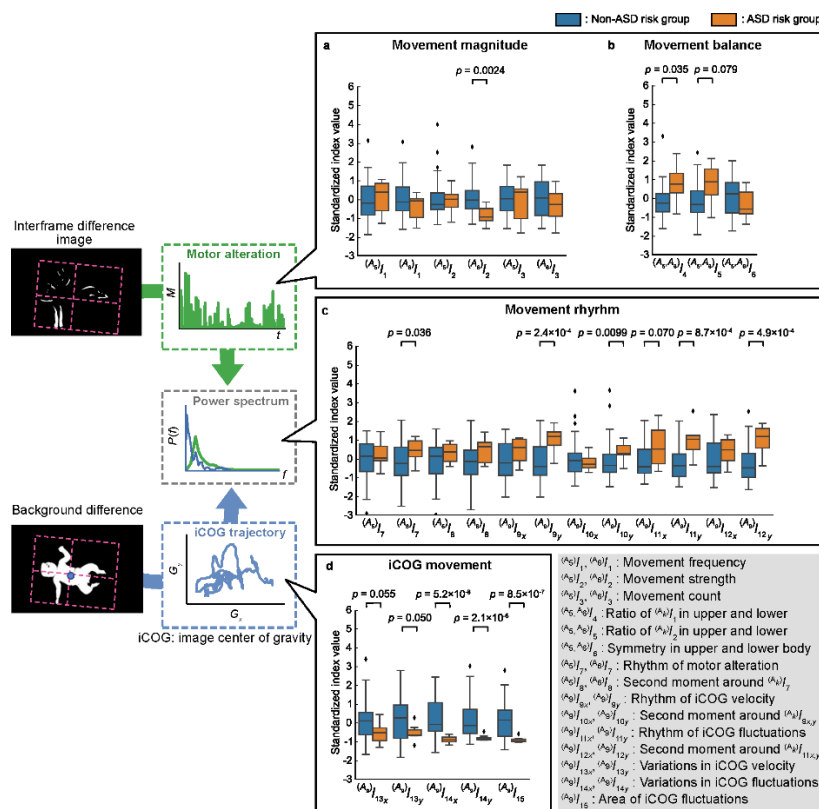

150

151 **Figure. 2.** Boxplots of features. a) movement magnitude, b) movement

152 rhythm and d) movement of the center of gravity (iCOG movement) in each group.

153 As can be seen from Figure 2, infants in the high-risk group exhibited significantly lower  
154 movement strength in their lower limbs ( $^{(A6)} I_2$ ;  $W = -4.10$ ;  $p = 0.0023$ ) and lower balance of  
155 movement between their upper and lower limbs ( $^{(A5, 6)} I_4$ ;  $W = 2.56$ ,  $p = 0.035$ ). In the domain of  
156 movement rhythmicity, infants in the high-risk group exhibited higher central frequencies and  
157 larger second moments around the central frequency in the time series of the body centre velocity,  
158 and a fluctuation along the left-right axis ( $I_{9, y}$ ,  $W = 4.94$ ,  $p < 0.001$ ;  $I_{10, y}$   $W = 2.89$ ,  $p = 0.0099$ ;  $I_{11,$   
159  $y$ ,  $W = 4.17$ ,  $p < 0.001$ ;  $I_{12, y}$ ,  $W = 4.76$ ,  $p < 0.001$ ). Examples of the temporal course of body center  
160 fluctuation and the distribution of frequency power are shown for low- and high-risk infants in  
161 Figure 3.

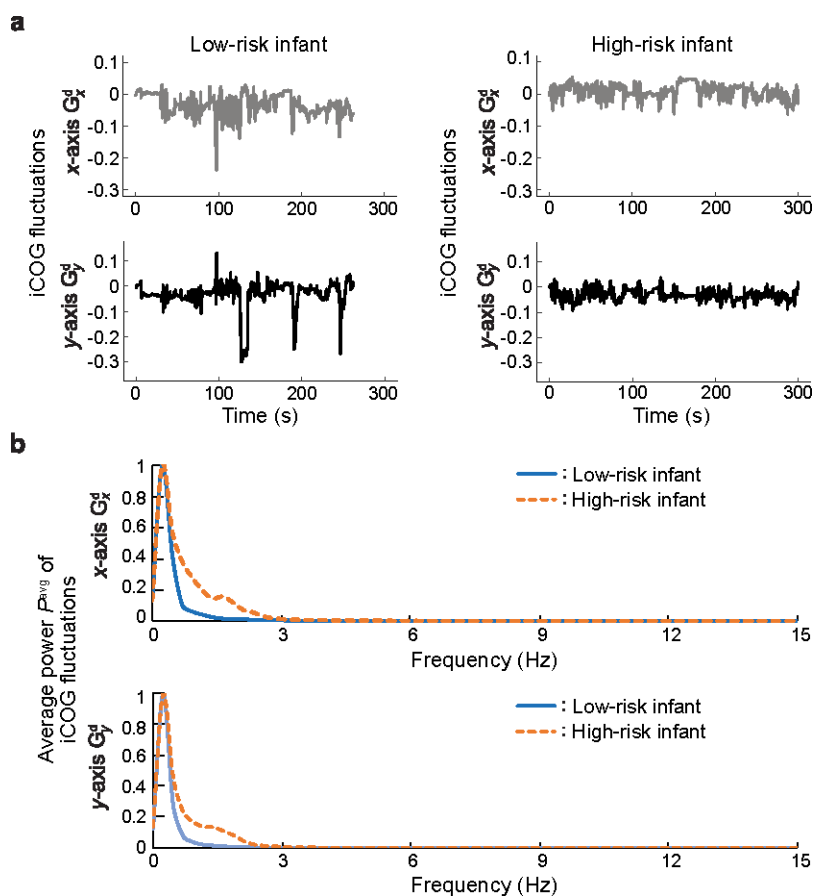

162

163 **Figure 3.** Example data of the temporal course of body center (iCOG) fluctuation (upper panels)

164 and power spectrum of iCOG fluctuation (lower panels).

165 The standard deviation of the body centre velocity and the fluctuation along the y-axis  
166 ( $I_{13,y}$ , Stat =  $-2.03$ ,  $p = 0.0501$ ;  $I_{14,y}$ ,  $W = -5.59$ ,  $p < 0.001$ ), and the area covered by the  
167 trajectory of the body centre excursion ( $I_{15}$ ,  $W = -5.96$ ,  $p < 0.001$ ) were significantly smaller in  
168 the high-risk group than in the low-risk group.

169 There were significant ( $p < 0.05$ ) and marginally significant ( $p < 0.10$ ) group differences  
170 across the 14 bodily movement features. For each pair out of the 14 features, we computed the  
171 correlation coefficient. Correlational coefficients between  $I_{9,y}$ ,  $I_{12,y}$ ,  $I_{11,y}$ , and between  $I_{11,y}$  and  $I_{11,x}$   
172 were above 0.7. Therefore, these four features were averaged into a single feature. The correlation  
173 coefficients between  $I_{13,x}$  and  $I_{13,y}$ ,  $I_{13,x}$  and  $I_{15}$ ,  $I_{13,y}$  and  $I_{15}$ ,  $I_{14,x}$  and  $I_{15}$ ,  $I_{14,y}$ , and  $I_{15}$  were all  
174 above 0.7. Thus, these five features were compressed into a single feature as well. After the  
175 compression, none of the absolute values of the pairwise correlation coefficients was above 0.7.

176

## 177 2-2. Group Classification using Machine Learning Algorithms

178 Four classifiers were trained using the seven selected features as predictors. The four  
179 machine learning algorithms included two linear classifiers, i.e. linear discriminant analysis (LDA)  
180 and logistic regression (LR), and two non-linear classifiers, i.e. a multi-layered perceptron (MLP)  
181 and a log-linearised Gaussian mixture network (LLGMN; Tsuji et al., 1999). The performance of  
182 the MLP and LLGMN depends on the initial state of their random weights. Thus, hyperparameter  
183 tuning was repeatedly performed using a nested leave-one-out procedure 10 times, for both the  
184 MLP and LLGMN. After the hyperparameter tuning, the average number of nodes in the hidden  
185 layer of the MLP was 11.39 (SD = 2.0), while the average number of components in the LLGMN  
186 was 2.59 (SD = 1.43). Below, we describe and discuss the performances of the MLP and LLGMN  
187 classifiers with the highest F1 score and the highest area under the precision-recall curve (AUC-  
188 PR). The confusion matrices generated by the four classifiers are shown in Figure 4. Fisher's exact

189 test on the data revealed significant associations between classifications made by each of the four  
 190 classifiers and grouping by the MCHAT score ( $p$ s < 0.003). Yule's coefficients of the associations  
 191 were above 0.85. The performance indicators evaluated using the leave-one-out procedure are  
 192 summarized in Table 3.

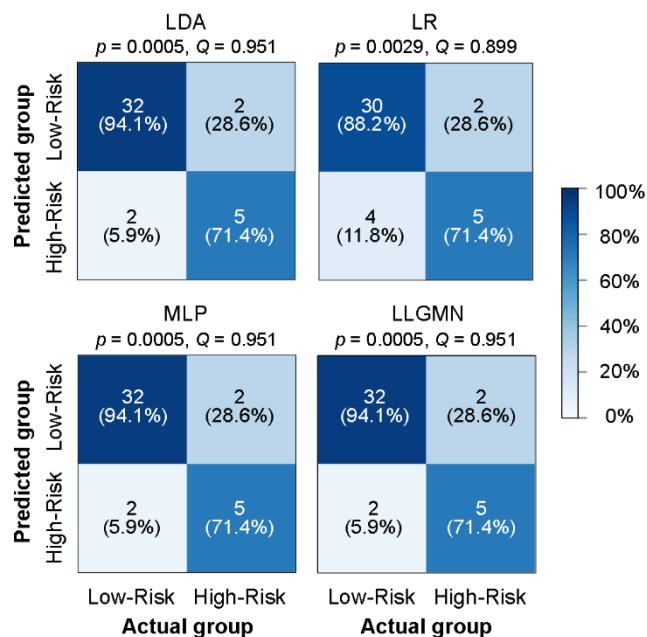

193

194 **Figure 4.** Confusion matrices summarizing the classification results by the four classifiers.

195

196 *Table 3. Sensitivity, Specificity, F1 score and AUCs of the four classifiers.*

|             | LDA   | LR    | MLP   | LLGMN |
|-------------|-------|-------|-------|-------|
| Sensitivity | 71.43 | 71.43 | 71.43 | 71.43 |
| Specificity | 94.12 | 88.24 | 94.11 | 94.11 |
| F1 score    | 71.43 | 62.5  | 71.43 | 71.43 |
| ROC-AUC     | 0.87  | 0.87  | 0.90  | 0.79  |
| ROC-PR      | 0.65  | 0.59  | 0.65  | 0.67  |

197

198

## 199 Discussion

200 The present study investigated the relationships between automatically extracted features of  
201 spontaneous bodily movements of 4-month-old infants and their MCHAT scores at 18 months of  
202 age. Infants at risk for ASD showed atypical characteristics for a variety of bodily movement  
203 features at 4 months of age. Further, four classifiers with bodily movement features as predictors  
204 succeeded in classifying infants with low and high ASD-like behaviours. Taken together, these  
205 findings indicate that bodily movement patterns at 4 months of age can inform about ASD-like  
206 behavioural tendencies at 18 months of age.

207 A close look at group differences of bodily movement patterns reveals that the bodily  
208 motion patterns of infants with high MCHAT scores are characterised mainly by (i) reduced  
209 frequency and strength of lower limb motion, and (ii) lack of rhythmicity in movements. The latter  
210 characteristic is reflected in a larger second moment around the central frequency in the time series  
211 of the body centre movement for these infants. For low-risk infants, large power was distributed  
212 around the central frequency, indicating that these infants moved their body centres periodically  
213 within a certain frequency range. Compared with low-risk infants, power was more diffusely  
214 distributed for high-risk infants, indicating that their movement patterns lacked notable rhythmic  
215 components.

216 It is generally known that children with ASD exhibit atypical patterns of motor control,  
217 such as clumsiness, reduced muscle tone, and poor motor coordination (Paquet et al., 2016; Provost  
218 et al., 2007; Fournier et al., 2010). These types of motoric atypicality potentially lead to reduced  
219 amplitude and frequency of limb motion and poor coordination of limb movements, as observed in  
220 the present study. The lack of rhythmicity in bodily motion patterns might indicate the atypicality  
221 of the central pattern generator (CPG) that generates a rhythmic pattern of involuntary movements.  
222 Because the CPG is responsible for generating rhythmicity in gait patterns, poor rhythmicity in

223 spontaneous movement patterns during infancy might be linked to atypical gait patterns often  
224 observed in children with ASD (Kindregan, Gallagher & Gormley, 2015).

225 Most items of the MCHAT concern the development of socio-cognitive functions, such as  
226 the theory of mind and joint attention. Thus, the present findings nicely dovetail with the  
227 observations by Bhat et al. (2012) that motor delay at 6 months of age is associated with delays in  
228 social communication at 18 months of age in infants with high risk of ASD. Considering these, one  
229 might be tempted to assume that features of spontaneous bodily movement, as quantified in the  
230 present study, are linked to later social development. However, it is premature to draw such a  
231 conclusion because impairments in motor and socio-cognitive functions might be connected to the  
232 atypicality of different sub-regions of identical neural structures in the autistic brain (Qiu et al.,  
233 2010).

234 Several studies have found that early signs of autistic traits can be detected well before the  
235 diagnosis of ASD (Adrien et al., 1993; Baranek, 1999; Osterling, Dawson, & Munson, 2002; Klin  
236 et al., 2009; Elsabbagh et al., 2012). Consistent with these observations, we succeeded in  
237 discriminating infants with high ASD risk from those with low ASD risk, using linear and non-  
238 linear classifiers. Overall, the four classifiers exhibited comparable performance, supporting the  
239 robustness of our findings that the bodily movement patterns at 4 months of age contain sufficient  
240 amount of information for predicting the emergence of ASD-like behaviour at 18 months of age.  
241 At the same time, the performance of the two non-linear classifiers was numerically superior to that  
242 of the linear classifiers. Astonishingly, the AUC-ROC for the MLP classifier was above 0.9,  
243 indicating the possibility that non-linear classification based on bodily movement features can  
244 achieve classification performance that is acceptable even in clinical settings.

245 The present findings provide preliminary results that lead to the establishment of objective  
246 markers for the early detection of autistic tendencies in children. A recent surge of studies on digital

247 phenotyping of ASD (Anzulewicz et al., 2016; Dawson et al., 2018; Ardalan et al., 2019) raised the  
248 possibility that behavioural features, quantified using low-cost non-invasive sensors, could provide  
249 reliable clues for detecting children and adults at risk for ASD. In a closely related study,  
250 Anzulewicz et al. (2016) succeeded in classifying children with ASD from their neurotypical  
251 counterparts by submitting finger movement patterns captured by touch sensors in tablets to  
252 machine learning-based analysis. A similar attempt was also reported by Ardalan et al. (2019) (for  
253 a brief review, see Doi, 2020). The current research extends the achievements of these previous  
254 studies by raising the possibility that atypicality in bodily movement patterns in infancy could be  
255 used for predicting later emergence of ASD-like tendencies during toddlerhood. A series of large-  
256 scale clinical studies have shown that ASD can be predicted based on the developmental patterns  
257 of brain surface structures (Hazlett et al., 2017) and resting state brain activation (Emerson et al.,  
258 2017) measured using magnetic resonance imaging during toddlerhood. It would be of great interest  
259 to determine whether comparable performance on the early diagnosis of ASD can be achieved using  
260 the digital phenotyping technique adopted in the present study.

261 The current study had some limitations. First, motor impairment is often observed in other  
262 neurological and psychiatric conditions. As such, several researchers questioned the specificity of  
263 atypical development of motor function as an early sign of ASD (Ozonoff et al., 2008; Provost et  
264 al., 2007). Second, we are not fully confident that bodily movement patterns are linked to ASD, or  
265 to the emergence of autism-like behaviours on the sub-clinical level. To address these limitations,  
266 the usefulness of our system for early screening of children with ASD should be tested in a long-  
267 term study with a prospective design that would recruit children genetically at high risk for ASD.

268

## 269 **4. Materials and Methods**

### 270 ***4.1. Participants***

271 Sixty-two 4-month-olds and their mothers participated in video recordings of bodily movement  
272 patterns in the present study as a part of the birth cohort study, after the caregivers gave their written  
273 informed consents. We used all the data available at the point of analysis without determining the  
274 sample size *a priori*, because the number of infants evaluated to be at high risk for ASD was  
275 predicted to be quite small. The mother-infant pairs were recruited in Nagasaki City, a rural city  
276 on Kyushu Island in Japan, through fliers or in-person advertisement in obstetrics and gynaecology  
277 clinics. The protocol of this study was reviewed and approved by the ethics committee of the  
278 Graduate School of Biomedical Sciences at Nagasaki University (Registration Number: 14050205-  
279 2) and the Graduate School of Engineering at Hiroshima University (Registration Number: E-1150-  
280 1).

281

## 282 **4.2. Procedure**

283 Mother-infant pairs participated in the present study at two time points, i.e. 4 and 18 months after  
284 birth. At 4 months of age, the subjects visited our laboratory at Nagasaki University. At this point,  
285 we video-recorded the bodily movements of infants while lying in the supine position, for later  
286 analysis. Meanwhile, mothers completed several questionnaires regarding their mental state and the  
287 development of their infants. We sent out questionnaires, including MCHAT, about a week before  
288 each infant reached the age of 18 months after birth, and asked the mothers to send back the  
289 questionnaires after answering them fully.

290

### 291 **4.2.1. Bodily Movement Recording**

292 Each infant subject was laid on a black mat, in a cream-white wooden crib. The infant's  
293 body, except for the head, arms, and limbs, was covered in a white wrap, for increasing the contrast  
294 between the infant's body and background. A video camera was affixed to a silver stainless bar



295 arching over the crib, and was directed downward toward the infant, as shown in the leftmost panel  
296 of Figure 1. The infant movements were recorded continuously. The average length of the recorded  
297 videos was 24,028 frames (SD = 8,425 frames; range = 9,600–50,940 frames). The frame rate  $f_s$   
298 and resolution of the video recordings were 30 fps and  $720 \times 480$  pixels, respectively.

## 299

### 300 *4.2.2. Self-Administered Questionnaires*

301 We asked the mothers to complete self-administered questionnaires at three points. The first  
302 batch of questionnaires was administered at the time of enrolment. The questionnaires asked for  
303 demographic information regarding her and her husband's age, socio-economic status, and medical  
304 history. At 4 months of age, information about the mother's mental state and infant's developmental  
305 state was collected at the lab; the results of this analysis will be reported elsewhere. At 18 months  
306 of age, we mailed questionnaires, including the MCHAT. The MCHAT included 23 items of  
307 Yes/No questions, asking whether a child exhibited developmental delays in socio-cognitive  
308 functions. The MCHAT also included items about atypical behaviors often observed in ASD, such  
309 as hypersensitivity to sensory stimulation. The cut-off point was three.

## 310

### 311 *2.3. Analysis*

#### 312 *2.3.1. Bodily Movement Analysis*

313 In the initial stage of processing, the recorded videos were divided into video sub-segments  
314 by deleting frames that contained the infants' sleep, crying, and accidental occurrence of external  
315 stimulation. Videos of continuous bodily movements were first converted into binary images by  
316 image thresholding, to extract the image of the infant's body as the foreground. Images of  
317 spontaneous bodily motion were then obtained by frame-by-frame subtraction. Motion in each area  
318 of the body was extracted from these images. The procedure for segmenting a static image into

319 body areas is as follows. First, the outer circumference of the infant's trunk within each frame was  
320 approximated using an ellipsoid. Then, a rectangle was defined such that the rectangle contained  
321 an ellipsoid within it with a margin. Thereafter, this rectangle was divided into four sub-regions,  
322 each containing the right arm, left arm, right leg, and left leg. Based on the bodily movement data  
323 within each quadrant of the entire rectangle, we calculated 26 features of bodily movement, as  
324 summarized in Table 2.

325

#### 326 *4.3.2. Feature Selection*

327 We first selected the features that are useful for classifying infants into low and high ASD  
328 risk groups. In the first stage of feature selection, we tested group differences on 26 features  
329 between infants with low and high ASD risk, using the Brunner—Munzel test. Features that showed  
330 significant group differences at the 10% significance threshold were retained for further analyses.  
331 This lenient threshold was adopted because we wished to retain as many informative features as  
332 possible for later classification using machine learning algorithms. In the second stage of feature  
333 selection, the correlation coefficients were computed for every pair of retained features. Pairs of  
334 features with correlation coefficients  $\geq 0.7$  were lumped into a single feature.

335

#### 336 *4.3.3 Group Classification by Machine Learning*

337 We examined whether bodily movements contain sufficient information for discriminating  
338 infants with high ASD risk from those with low ASD risk, using machine learning approaches. Four  
339 classifiers were trained for predicting whether an infant belonged to the high-risk group based on  
340 the selected bodily movement features, using supervised learning. The four machine learning  
341 algorithms included two linear classifiers, i.e. the linear discriminant analysis (LDA) and the  
342 logistic regression (LR), and two non-linear classifiers, i.e. the multi-layered perceptron (MLP) and

343 the log-linearised Gaussian mixture network (LLGMN; Tsuji et al., 1999). The MLP included one  
344 hidden layer, the activation function of which was a rectified linear unit. The performance of the  
345 four classifiers was cross-validated using the leave-one-out procedure. In the leave-one-out  
346 approach, the data of one of the participants were treated as unknown test data, while the data of  
347 the remaining participants were used for training the corresponding classifier. This cycle was  
348 repeated until the data from every participant served as the test data. The MLP and LLGMN each  
349 included one hyperparameter, i.e. the number of hidden layers and the number of components,  
350 respectively. These hyperparameters were tuned using a nested leave-one-out procedure  
351 (Parvandehe et al., 2020). Fisher's exact test was performed for testing associations between the  
352 classifications made by each of the classifiers used in this study and grouping by the MCHAT  
353 scores. Yule's correlation coefficient (Yule's Q) was also calculated, for confirming the strength of  
354 each association. The performances of the classifiers were compared in terms of the sensitivity, the  
355 specificity, the F1 score, the area under curve of receiver-operator-characteristic curve (AUC-ROC),  
356 and the area under the precision-recall curve (AUC-PR) as performance indicators.

357

358

359 **Acknowledgments**

360 This work was supported by JSPS KAKENHI Grant-in-Aid for Scientific Research(C)(Grant  
361 Number 26461769 and 17K01904) to H.D.

362

363 **Competing Interests**

364 The authors declare no competing interests.

365

366 **References**

- 367 Abu-Akel, A., Allison, C., Baron-Cohen, S., Heinke, D. The distribution of autistic traits across  
368 the autism spectrum: evidence for discontinuous dimensional subpopulations underlying  
369 the autism continuum. *Molecular Autism* **10**:24 (2019). doi: 10.1186/s13229-019-0275-3.
- 370 Adrien, J. L., Lenoir, P., Martineau, J., Perrot, A., Hameury, L., Larmande, C., et al. Blind ratings  
371 of early symptoms of autism based upon family home movies. *Journal of the American*  
372 *Academy of Child & Adolescent Psychiatry* **32**, 617–626 (1993).
- 373 American Psychiatric Association. Diagnostic and statistical manual of mental disorders. 5th ed  
374 (American Psychiatric Association, Arlington, VA, 2013)
- 375 Anderson, G.M. (2015). Autism biomarkers: challenges, pitfalls and possibilities. *Journal of*  
376 *Autism and Developmental Disorders* **45** (4), 1103-13 (2013).
- 377 Anzulewicz, A., Sobota, K., Delafield-Butt, J.T. Toward the Autism Motor Signature: Gesture  
378 patterns during smart tablet gameplay identify children with autism. *Scientific Reports* **24**,  
379 6, 31107 (2016). doi: 10.1038/srep31107.
- 380 Ardalan, A, Assadi, A.H., Surgent, O.J., Travers, B.G. Whole-Body Movement during  
381 Videogame Play Distinguishes Youth with Autism from Youth with Typical Development.  
382 *Scientific Reports* **9**(1), 20094 (2019). doi: 10.1038/s41598-019-56362-6.
- 383 Baranek, G.T. Autism during infancy: a retrospective video analysis of sensory-motor and social  
384 behaviors at 9-12 months of age. *Journal of Autism and Developmental Disorders* **29**(3),  
385 213-24 (1999).
- 386 Bhat, A.N., Galloway, J.C., Landa, R.J. Relation between early motor delay and later  
387 communication delay in infants at risk for autism. *Infant Behavior and Development* **35**(4)  
388 838-46 (2012). doi: 10.1016/j.infbeh.2012.07.019.

- 389 Brian, J.A., Zwaigenbaum, L., Ip, A., Canadian Paediatric Society, Autism Spectrum Disorder  
390 Guidelines Task Force. Standards of diagnostic assessment for autism spectrum disorder.  
391 *Paediatrics & Child Health* **24**(7), 444–451 (2019).
- 392 Burger, M., Louw, Q.A. The predictive validity of general movements--a systematic review.  
393 *European Journal of Paediatric Neurology* **13**(5), 408-20 (2009).
- 394 Dawson, G., Campbell, K., Hashemi, J., Lippmann, S.J., Smith, V., Carpenter, K., Egger, H.,  
395 Espinosa, S., Vermeer, S., Baker, J., Sapiro, G. Atypical postural control can be detected  
396 via computer vision analysis in toddlers with autism spectrum disorder. *Scientific Reports*  
397 **8**, 17008. (2018).
- 398 Dawson, G., Osterling, J., Meltzoff, A.N., Kuhl, P. Case Study of the Development of an Infant  
399 with Autism from Birth to Two Years of Age. *Journal of Applied Developmental*  
400 *Psychology* **21**(3), 299-313 (2000).
- 401 Dawson, G. Early behavioral intervention, brain plasticity, and the prevention of autism spectrum  
402 disorder. *Developmental Psychopathology* **20**(3), 775-803 (2008).
- 403 Dawson, G., Rogers, S., Munson, J., Smith, M., Winter, J., Greenson, J., Donaldson, A., Varley,  
404 J. Randomized, controlled trial of an intervention for toddlers with autism: the Early Start  
405 Denver Model. *Pediatrics* **125**(1), e17-23 (2010).
- 406 Doi, H. Digital phenotyping of autism spectrum disorders based on color information: brief  
407 review and opinion. *Artificial Life and Robotics* **25**, 329–334 (2020).  
408 <https://doi.org/10.1007/s10015-020-00614-6>
- 409 Einspieler, C., Sigafos, J., Bölte, S., Bratl-Pokorny, K.D., Landa, R., Marschik, P.B.  
410 Highlighting the first 5 months of life: General movements in infants later diagnosed with  
411 autism spectrum disorder or Rett Syndrome. *Research in Autism Spectrum Disorders* **8**(3),  
412 286-291 (2014).

- 413 Einspieler, C., Bos, A.F., Libertus, M.E., Marschik, P.B. The General Movement Assessment  
414 Helps Us to Identify Preterm Infants at Risk for Cognitive Dysfunction. *Frontiers in*  
415 *Psychology* **7**:406 (2016).
- 416 Elsabbagh, M., Mercure, E., Hudry, K., Chandler, S., Pasco, G., Charman T., Pickles, A., Baron-  
417 Cohen, S., Bolton, P., Johnson, M.H., BASIS Team. Infant neural sensitivity to dynamic  
418 eye gaze is associated with later emerging autism. *Current Biology* **22**(4), 338-42 (2012).
- 419 Emerson, R.W. et al. Functional Neuroimaging of High-Risk 6-month-old Infants Predicts a  
420 Diagnosis of Autism at 24 Months of Age. *Science Translational Medicine* **9**(393),  
421 eaag2882 (2017). doi: 10.1126/scitranslmed.aag2882.
- 422 Esposito, G., Venuti, P., Maestro, S., Muratori, F An exploration of symmetry in early autism  
423 spectrum disorders: analysis of lying. *Brain and Development* **31**(2) 131-8 (2009).
- 424 Esposito, G., Venuti, P., Apicella, F., Muratori, F. Analysis of unsupported gait in toddlers with  
425 autism. *Brain and Development* **33**(5) 367-7 (2011).
- 426 Fournier, K.A., Hass, C.J., Naik, S.K., Lodha, N., Cauraugh, J.H. Motor coordination in autism  
427 spectrum disorders: a synthesis and meta-analysis. *Journal of Autism and Developmental*  
428 *Disorders* **40**(10) 1227-40 (2010).
- 429 Gao, Y., Long, Y., Guan, Y., Basu, A., Baggaley, J., T. Ploetz. Towards Reliable, Automated  
430 General Movement Assessment for Perinatal Stroke Screening in Infants Using Wearable  
431 Accelerometers. *Proceedings of the ACM on Interactive, Mobile, Wearable and*  
432 *Ubiquitous Technologies archive* **3** (1) art.no. 12 (2019).
- 433 Green, J., Charman, T., Pickles, A., Wan, M.W., Elsabbagh, M., Slonims, V., Taylor, C.,  
434 McNally, J., Booth, R., Gliga, T., Jones, E.J., Harrop, C., Bedford, R., Johnson, M.H.,  
435 BASIS team. Parent-mediated intervention versus no intervention for infants at high risk

- 436 of autism: a parallel, single-blind, randomised trial. *Lancet Psychiatry* **2**(2), 133-40  
437 (2015).
- 438 Hadders-Algra, M., Bouwstra, H., Groen, S.E. Quality of general movements and psychiatric  
439 morbidity at 9 to 12 years. *Early Human Development* **85**(1), 1-6 (2009).
- 440 Hayes, J., Ford, T., Rafeeqe, H., Russell, G. Clinical practice guidelines for diagnosis of autism  
441 spectrum disorder in adults and children in the UK: a narrative review. *BMC Psychiatry*  
442 **18**(1) art.no. 222 (2009).
- 443 Hazlett, H.C. et al. Early Brain Development in Infants at High Risk for Autism Spectrum  
444 Disorder. *Nature* **542**(7641) 348-351 (2017). doi: 10.1038/nature21369.
- 445 Inada, N., Koyama, T., Inokuchi, E., Kuroda, M., Kamio, Y. Reliability and Validity of the  
446 Japanese Version of the Modified Checklist for Autism in Toddlers (M-CHAT). *Research*  
447 *in Autism Spectrum Disorders* **5**(1), 330-336 (2011).
- 448 Kamio, Y., Haraguchi, H., Stickley, A., Ogino, K., Ishitobi, M., Takahashi, H. Brief Report: Best  
449 Discriminators for Identifying Children with Autism Spectrum Disorder at an 18-Month  
450 Health Check-Up in Japan. *Journal of Autism and Developmental Disorders* **45**(12), 4147-  
451 53 (2015).
- 452 Kawashima, K., Funabiki, Y., Ogawa, S., Hayashi, H., Soh, Z., Furui, A., Sato, A., Shiwa, T.,  
453 Mori, H., Shimatani, K., Mogami, H., Konishi, Y., Tsuji, T. Video-based Evaluation of  
454 Infant Crawling toward Quantitative Assessment of Motor Development. *Scientific*  
455 *Reports* **10**(11266), (2020). doi:10.1038/s41598-020-67855-0
- 456 Kim, S. ppcor: An R Package for a Fast Calculation to Semi-partial Correlation Coefficients.  
457 *Communications for Statistical Applications and Methods* **22**(6) 665-674 (2015).
- 458 Kinoshita, N., Furui, A., Soh, Z., Hayashi, H., Shibanoki, T., Mori, H., Shimatani, K., Funabiki,  
459 Y., Tsuji, T. Longitudinal Assessment of U-shaped and Inverted U-shaped Developmental



460 Changes in the Spontaneous Movements of Infants via Markerless Video Analysis.

461 *Scientific Reports* **10**(16827) (2020).

462 Klin, A., Lin, D.J., Gorrindo, P., Ramsay, G., Jones, W. Two-year-olds with autism orient to non-  
463 social contingencies rather than biological motion. *Nature*, 459(7244), pp. 257-61. (2009).

464 Kindregan, D., Gallagher, L., Gormley, J. Gait deviations in children with autism spectrum

465 disorders: a review. *Autism Research and Treatment* 741480. (2015). doi:

466 10.1155/2015/741480.

467 Landa, R.J., Gross, A.L., Stuart, E.A., Faherty, A. Developmental trajectories in children with and

468 without autism spectrum disorders: the first 3 years. *Child Development* **84**(2), 429-42

469 (2013).

470 Marcroft, C., Khan, A., Embleton, N.D., Trenell, M., Plötz, T. Movement recognition technology

471 as a method of assessing spontaneous general movements in high risk infants. *Frontiers in*

472 *Neurology* **5**:284 (2015).

473 Osawa, Y., Shima, K., Bu, N., Tsuji, T., Tsuji, T., Ishii, I., Matsuda, H., Orito, K., Ikeda, T.,

474 Noda, S. A Motion-based System to Evaluate Infant Movements Using Real-time Video

475 Analysis. *13th International Conference on Biomedical Engineering* 2043-2047 (2009).

476 Osterling, J.A., Dawson, G., Munson, J.A. Early recognition of 1-year-old infants with autism

477 spectrum disorder versus mental retardation. *Developmental Psychopathology* **14**(2) 239-

478 51 (2002).

479 Ozonoff, S., Young, G.S., Goldrin, S., Greiss-Hess, L., Herrera, A.M., Steele, J., Macari, S.,

480 Hepburn, S., Rogers, S.J. Gross motor development, movement abnormalities, and early

481 identification of autism. *Journal of Autism and Developmental Disorders* **38**(4) 644-56

482 (2008).

- 483 Paquet, A., Olliac, B., Bouvard, M.P., Golse, B., Vaivre-Douret, L. The Semiology of Motor  
484 Disorders in Autism Spectrum Disorders as Highlighted from a Standardized Neuro-  
485 Psychomotor Assessment. *Frontiers in Psychology* **7**: 1292 (2016).
- 486 Parvande, S., Yeh, H.W., Paulus, M.P., McKinney, B.A. Consensus features nested cross-  
487 validation. *Bioinformatics* **36**(10) 3093–3098 (2020).
- 488 Provost, B., Lopez, B.R., Heimerl, S. A comparison of motor delays in young children: autism  
489 spectrum disorder, developmental delay, and developmental concerns. *Journal of Autism  
490 and Developmental Disorders* **37**(2) 321-8 (2007).
- 491 Qiu, A., Adler, M., Crocetti, D., Miller, M.I., Mostofsky, S.H. Basal ganglia shapes predict  
492 social, communication, and motor dysfunctions in boys with autism spectrum disorder.  
493 *Journal of the American Academy of Child and Adolescent Psychiatry* **49**(6) 539-51  
494 (2010).
- 495 Rinehart, N.J., Tonge, B.J., Iannsek, R., McGinley, J., Brereton, A.V., Enticott, P.G., Bradshaw,  
496 J.L. Gait function in newly diagnosed children with autism: Cerebellar and basal ganglia  
497 related motor disorder. *Developmental Medicine & Child Neurology* **48**(10) 819-24  
498 (2006).
- 499 Sacrey, L.R., Zwaigenbaum, L., Bryson, S., Brian, J., Smith, I.M. The reach-to-grasp movement  
500 in infants later diagnosed with autism spectrum disorder: a high-risk sibling cohort study.  
501 *Journal of Neurodevelopmental Disorders* **10**(1):41 (2018). doi: 10.1186/s11689-018-  
502 9259-4.
- 503 Sealey, L. A., Hughes, B. W., Sriskanda, A. N., Guest, J. R., Gibson, A. D., Johnson-Williams,  
504 L., ... Bagasra, O. Environmental factors in the development of autism spectrum disorders.  
505 *Environment International* **88** 288–298 (2016).

- 506 Støen, R., Songstad, N.T., Silberg, I.E., Fjørtoft, T., Jensenius, A.R., Adde, L. Computer-based  
507 video analysis identifies infants with absence of fidgety movements. *Pediatric Research*  
508 **82**(4) 665-670 (2017).
- 509 Tacchino, C., Impagliazzo, M., Maggi, E., Bertamino, M., Bianchi, I., Campone, F., Durand, P.,  
510 Fato, M., Giannoni, P., Iandolo, R., Izzo, M., Morasso, P., Moretti, P., Ramenghi, L.,  
511 Shima, K., Shimatani, K., Tsuji, T., Uccella, S., Zanardi, N., Casadio, M. Spontaneous  
512 movements in the newborns: a tool of quantitative video analysis of preterm babies.  
513 *Computer Methods and Programs in Biomedicine* **199**(105838) (2021).  
514 [doi.org/10.1016/j.cmpb.2020.105838](https://doi.org/10.1016/j.cmpb.2020.105838).
- 515 Teitelbaum, P., Teitelbaum, O., Nye, J., Fryman, J., Maurer, R.G. Movement analysis in infancy  
516 may be useful for early diagnosis of autism. *Proceedings of the National Academy of*  
517 *Sciences of the United States of America* **95**(23) 13982-7 (1998).
- 518 Tsuji, T., Nakashima, S., Hayashi, H., Soh, Z., Furui, A., Shibanoki, T., Shima, K., Shimatani, K.  
519 Markerless Measurement and Evaluation of General Movements in Infants. *Scientific*  
520 *Reports* **10**(1422) (2020) [doi:10.1038/s41598-020-57580-z](https://doi.org/10.1038/s41598-020-57580-z).
- 521 Tsuji, T., Fukuda, O., Ichinobe, H., Kaneko, M. A Log-Linearized Gaussian Mixture Network  
522 and Its Application to EEG Pattern Classification. *IEEE Transactions on Systems, Man,*  
523 *and Cybernetics-Part C: Applications and Reviews* **29**(1) 60-72 (1999).
- 524 Zwaigenbaum, L., Bryson, S., Lord, C., Rogers, S., Carter, A., Carver, L., Chawarska, K.,  
525 Constantino, J., Dawson, G., Dobkins, K., Fein, D., Iverson, J., Klin, A., Landa, R.,  
526 Messinger, D., Ozonoff, S., Sigman, M., Stone, W., Tager-Flusberg, H., Yirmiya, N.  
527 Clinical assessment and management of toddlers with suspected autism spectrum disorder:  
528 insights from studies of high-risk infants. *Pediatrics* **123**(5) 1383-91(2009).
- 529

## 530 Appendix

### 531 Definitions of Bodily Movement Features

532 In the bodily movement analysis, each frame of the  $s$ -th video sub-segment was converted into a  
533 binary image after segregating the infant body from the background. Based on the rectangle defined  
534 around the infant body in each frame, seven bodily regions,  $A_k$  ( $k = 1-7$ ), were  
535 defined.  $A_{1-4}$  represented the upper right, upper left, lower right, and lower left quadrants,  
536 respectively.  $A_5$  and  $A_6$  were defined as  $A_1 + A_2$  and  $A_3 + A_4$ , respectively, thus representing the  
537 upper and lower body. Finally, the whole body,  $A_7$ , was defined as the sum of  $A_5$  and  $A_6$ .

538 From the binary image, body posture,  $^{(A_k)}P_l$ , and body movement,  $^{(A_k)}M_l$ , in each area  $A_k$   
539 in the  $l$ -th frame ( $l \leq L_s$ ) were extracted, based on the following equations:

$$541 \quad ^{(A_k)}P_l = \sum_{w=1}^W \sum_{h=1}^H ^{(A_k)}O_l(x_w, y_h)$$

$$542 \quad ^{(A_k)}M_l = \frac{\sum_{w=1}^W \sum_{h=1}^H ^{(A_k)}O'_l(x_w, y_h)}{^{(A_7)}P_{ave}}$$

544  
545  
546 where  $^{(A_k)}O'_l(x_w, y_h)$  is the pixel value of the image obtained by the frame-by-frame subtraction  
547 represented by a binary number (0 or 1) at pixel coordinates  $(x_w, y_h)$  within area  $A_k$ .  
548  $^{(A_k)}O'_l(x_w, y_h)$  is zero.  $W$  and  $H$  represent the number of pixels along the  $x$ - and  $y$ -axes within each  
549 area, respectively.  $^{(A_7)}P_{ave}$  is the average of the maximal values of  $^{(A_7)}P_l$  up to the  $E$ -th frame of  
550 the first  $L_e$  ( $E \leq L_e$ ) frames of the first video sub-segment.  $L_e$  was set to 30 frames. When  $^{(A_k)}M_l$   
551 exceeded the threshold value of  $M_{th}$ , the  $l$ -th frame was judged to contain a bodily movement in

552 area  $A_k$ . We hereinafter refer to a frame that contains a bodily movement in area  $A_k$  as “a frame  
553 with a bodily movement”

554 The coordinates of the body centre at the  $l$ -th frame,  $(G_{l,x}, G_{l,y})$ , were calculated by the  
555 following equations:

556

$$557 \quad G_{l,x} = \frac{1}{(A_7)P_l} \sum_{w=1}^W \sum_{h=1}^H x_w^{(A_7)} O_l(x_w, y_h)$$

558

$$559 \quad G_{l,y} = \frac{1}{(A_7)P_l} \sum_{w=1}^W \sum_{h=1}^H y_h^{(A_7)} O_l(x_w, y_h)$$

560

561 The velocity of the body centre was calculated as the frame-by-frame difference of the body centre  
562 coordinates at the  $l$ -th frame,  $(G_{l,x}^v, G_{l,y}^v)$ . The fluctuation of the body centre  $(G_{l,x}^d, G_{l,y}^d)$  was  
563 calculated based on the average of the body centre coordinates,  $(G_x^{ave}, G_y^{ave})$ , over the first  $L_e$   
564 frames of the first video sub-segment, by the following equations:

565

$$566 \quad G_{l,j}^v = \frac{f_s(G_{l,j} - G_{l-1,j})}{\sqrt{(A_7)P_{ave}}}$$

567

$$568 \quad G_{l,j}^d = \frac{G_{l,j} - G_j^{ave}}{\sqrt{(A_7)P_{ave}}}$$

569

570 where  $j$  is  $x$  or  $y$ .  $G_{1,x}^v = 0$  and  $G_{1,y}^v = 0$ .

571

572

## 573 **1. Movement Magnitude**

### 574 ***1-1. I<sub>1</sub>: Movement Frequency***

575 Movement frequency was defined as the proportion of the number of frames with bodily  
576 movement against the total number of frames  $L$ , which is the total length of video sub-segments:

577

$$578 \quad {}^{(A_k)}I_1 = \frac{100}{L} \sum_s^S \sum_l^{L_s} {}^{(A_k)}\kappa_l$$

579

$$580 \quad {}^{(A_k)}\kappa_l = \begin{cases} 1 & {}^{(A_k)}M_l \geq M_{th} \\ 0 & {}^{(A_k)}M_l < M_{th} \end{cases}$$

$$581 \quad M_{th} = 0.005$$

582

### 583 ***1-2. I<sub>2</sub>: Movement Strength***

584 Movement strength was defined as the average magnitude of movement within frames  
585 with a bodily movement. In the following equation,  $L'$  represents the total number of frames with  
586 bodily movements:

$$587 \quad {}^{(A_k)}I_2 = \frac{1}{L'} \sum_s^S \sum_l^{L_s} {}^{(A_k)}\nu_l$$

588

$$589 \quad {}^{(A_k)}\nu_l = \begin{cases} {}^{(A_k)}M_l & {}^{(A_k)}M_l \geq M_{th} \\ 0 & {}^{(A_k)}M_l < M_{th} \end{cases}$$

590

591

592 **1-3.  $I_3$ : Movement Count**

593 Movement count was defined as the number of temporal segments where continuous  
594 bodily movement was detected, divided by the total number of frames  $L$ . Every frame within each  
595 temporal segment met  $^{(A_k)}M_l \geq M_{th}$ . Simultaneously,  $^{(A_k)}M_l < M_{th}$  was in the frame just before  
596 the first frame of the temporal segment and in the frame immediately after the last frame of the  
597 temporal segment. The movement count was calculated by the following equation, where  $^{(A_k)}Q_s$   
598 represents the number of temporal segments within the  $s$ -th video sub-segment:

599

600 
$$^{(A_k)}I_3 = \frac{1}{L} \sum_s^{(A_k)}Q_s$$

601

602 **2. Movement Balance**

603 **2-1.  $I_4$ : Ratio of Movement Frequency**

604 The ratio of the movement frequency between the bodily regions  $A_{k1}$  and  $A_{k2}$  was defined  
605 by the following equation:

606

607 
$$^{(A_{k1}, A_{k2})}I_4 = \frac{^{(A_{k1})}I_1}{^{(A_{k2})}I_1}$$

608

609 **2-2.  $I_5$ : Ratio of Movement Strength**

610 The ratio of the movement strength between the bodily regions  $A_{k1}$  and  $A_{k2}$  was defined  
611 by the following equation:

612

613 
$${}^{(A_{k1}, A_{k2})}I_5 = \frac{{}^{(A_{k1})}I_2}{{}^{(A_{k2})}I_2}$$

614

### 615 **2-3. $I_6$ : Movement Coordination**

616 Movement coordination between the bodily regions  $A_{k1}$  and  $A_{k2}$  was calculated as the  
617 correlation coefficient  $r_{(A_{k1}, A_{k2})}$  between the time-series data of  ${}^{(A_{k1})}M_l$  and  ${}^{(A_{k2})}M_l$  according to  
618 the equation below. Correlation coefficients were computed within sliding temporal windows with  
619 a length of  $L_c$ .  $L_c$  was set to 300 frames. The stride of the sliding window was one frame. Correlation  
620 coefficients were then averaged to yield a single index of the movement coordination.

621 
$$r_{(A_{k1}, A_{k2})} = \frac{\sigma({}^{(A_{k1})}M_l, {}^{(A_{k2})}M_l)}{\sigma({}^{(A_{k1})}M_l)\sigma({}^{(A_{k2})}M_l)}$$

622

## 623 **3. Movement Rhythm**

### 624 **3-1. Central Frequency ( $I_7$ ) and Second Moment around Central Frequency ( $I_8$ ) of Movement**

625 The time-series data of  $M_l$  of each video sub-segment were analysed in the frequency  
626 domain. Within each video sub-segment, the time-series data within a sliding window with the  
627 length of  $L_f$  were subjected to the fast Fourier transformation.  $L_f$  was set to 128 frames. The stride  
628 of the moving window was one frame. Then, the average power spectrum density (PSD),  $P(f)$ ,  
629 was computed by grand-averaging PSDs across all the sliding windows in all the video sub-segments.  
630 Based on  $P(f)$ , central frequency ( $F_{ctr}$ ) and second moment around the central frequency ( $D_{ctr}$ )  
631 were computed according to the following equations, where  $f_{max}$  is the maximal frequency range  
632 for analysis.  $f_{max}$  was 15 Hz.  $F_{ctr}$  and  $D_{ctr}$ , computed on the basis of  $P(f)$ , correspond to  $I_7$  and  
633  $I_8$ , respectively:

634



635 
$$F_{cntr} = \frac{\sum_0^{f_{max}} fP(f)}{\sum_0^{f_{max}} P(f)}$$

636

637 
$$D_{cntr} = \frac{\sum_0^{f_{max}} (f - F_{cntr})^2 P(f)}{\sum_0^{f_{max}} P(f)}$$

638

639 **3-2. Central Frequency ( $I_{9,x}$ ,  $I_{9,y}$ ) and Second Moment around Central Frequency ( $I_{10,x}$ ,**  
640  **$I_{10,y}$ ) of Body Centre Velocity**

641 The time-series data of the body centre velocity along the x- (top-bottom) and y- (left-right)  
642 axes were subjected to the fast Fourier transformation. Based on the resulting PSD, the central  
643 frequency and the second moment around the central frequency were computed in essentially the  
644 same manner as described in *Section 3-1*.

645

646 **3-3. Central Frequency ( $I_{11,x}$ ,  $I_{11,y}$ ) and Second Moment around Central Frequency ( $I_{12,x}$ ,**  
647  **$I_{12,y}$ ) of Body Centre Fluctuation**

648 The time-series data of body centre fluctuation along the x- (top-bottom) and y- (left-right)  
649 axes were subjected to the fast Fourier transformation. Based on the resulting PSD, the central  
650 frequency and the second moment around the central frequency were computed in essentially the  
651 same manner as described in *Section 3-1*.

652

653 **4. Movement of the Body Centre**

654 **4-1.  $I_{13}$ : Mean Absolute Body Centre Velocity**

655 The average absolute values of the body centre velocity along the x- ( $G_{l,x}^v$ ) and y-axes ( $G_{l,y}^v$ )  
656 were computed using the following equations:

657

$$(I_{13,x}, I_{13,y}) = \left( \frac{1}{L} \sum_s^S \sum_l^{L_s} |G_{l,x}^v|, \frac{1}{L} \sum_s^S \sum_l^{L_s} |G_{l,y}^v| \right)$$

659

#### 660 **4-2. $I_{14}$ : Standard Deviation of Body Centre Fluctuation**

661 The mean standard deviations of the body centre fluctuations along the x- ( $G_{l,x}^d$ ) and y- axis  
662 ( $G_{l,y}^d$ ),  $\sigma_{x,y}$ , within each video sub-segment were computed by averaging the standard deviations in  
663 the sliding temporal windows of length  $L_g$ , calculated following the equation below.  $L_g$  was set to  
664 300 frames. The stride of the sliding window was one frame:

665

$$666 \sigma_j = \sqrt{\frac{1}{L_g} \sum_l^{L_g} (G_{l,j}^d - \text{avg} G_j^d)^2}$$

667

668 where  $j$  is  $x$  or  $y$ , and  $\text{avg} G_j^d$  represent the mean of  $G_{l,j}^d$  within each sliding window. Then,  $I_{14,x}$  and  
669  $I_{14,y}$  were computed by averaging  $\sigma_j$  along each axis, across all video sub-segments.

670

#### 671 **4-3. $I_{15}$ : Area of Body Centre Excursion**

672 The area within the outer circumference of the trajectory of the body centre excursion within  
673 each video sub-segment was computed by averaging the areas in the sliding temporal windows of  
674 length  $L_g$ . The stride of the sliding windows was one frame. Then,  $I_{15}$  was computed by averaging  
675 the area of body excursions across all video sub-segments.

676

677

678
